# Supplementary material for: Self-reported functioning among patients with ultra-rare nemaline myopathy or a related disorder in Finland: a pilot study
Source: Springer Nature journal article supplement (doi:10.1186/s13023-023-02973-2), 2023-11-30
Supplement: MOESM1 [file 13023_2023_2973_MOESM1_ESM.pdf]

**Additional file 1:** ICF categories for the areas of functioning assessed; the source of the item used (and number of items), and Cronbach's  $\alpha$ -value for the sum variables.

## **b: BODY FUNCTIONS (FNCS)**

### **b1: MENTAL FUNCTIONS**

#### **b130 energy and drive fncs (fatigue)**

PROMIS® - Fatigue (4)  
PROMIS® - Global health (1)  
 $\alpha$ -value 0.908

#### **b134 sleep fncs:**

PROMIS® - Sleep Disturbance (4)  
 $\alpha$ -value 0.906

#### **b152 emotional fncs:**

PROMIS® - Global Health (1)  
PROMIS® - Anxiety (1)  
PROMIS® - Anger (1)  
PROMIS® - Depression (3)  
 $\alpha$ -value 0.894

### **b2: SENSORY FNCS AND PAIN**

#### **b280 sensation of pain**

PROMIS® - Global Health (1)  
PROMIS® - Pain Interference (3)  
 $\alpha$ -value 0.937

#### **b2801(a) joint pain**

LYHTY (1)

#### **b2801(b) muscle pain**

LYHTY (3)  
 $\alpha$ -value 0.829

### **b7: NEUROMUSCULOSKELETAL AND MOVEMENT-RELATED FNCS**

#### **b735 muscle tone fncs**

LYHTY (2)  
 $\alpha$ -value 0.732

## **d: PARTICIPATION AND ACTIVITIES**

### **d2: GENERAL TASKS AND DEMANDS**

#### **d230 carrying out daily routine**

PROMIS® - Satisfaction with Participation in Social Roles (PSR) (1)

### **d4: MOBILITY**

#### **d410 changing and maintaining body position**

PROMIS® - Physical Functioning (5)  
RG (1)  
 $\alpha$ -value 0.947

#### **d445 hand and arm use**

PROMIS® - Physical Functioning (8)  
 $\alpha$ -value 0.958

#### **\*d450 Walking and D465 moving around using equipment**

RG (3)  
 $\alpha$ -value 0.95

#### **d4600 moving around within a home**

PROMIS® - Physical Functioning (1)

### **d5: SELF CARE**

#### **d510 washing oneself, D530 toileting,**

#### **d540 dressing**

PROMIS® - Physical Functioning (7)  
 $\alpha$ -value 0.959

### **d6: DOMESTIC LIFE**

#### **d620 acquisition of goods and services**

PROMIS® - Physical Functioning (2)  
 $\alpha$ -value 0.79

#### **d640 doing housework**

PROMIS® - Physical Functioning (1)

#### **d698 other specified domestic life**

#### **-leisure time at home**

PROMIS® - Satisfaction with Participation in Discretionary Social Activities (DSA) (1)

### **d7: INTERPERSONAL INTERACTIONS AND RELATIONSHIPS**

#### **d7500 relationships with friends and d760 family**

PROMIS® - Satisfaction with PSR (1)  
PROMIS® item - Satisfaction with Participation in DSA  
(1)  $\alpha$ -value 0.87

## **e: ENVIRONMENTAL FACTORS**

### **e1: PRODUCTS AND TECHNOLOGIES**

#### **e1151 assistive products and technology for personal use in daily living**

LYHTY (1)

#### **\*e1201 assistive products and**

#### **technology for personal indoor and outdoor mobility and transportation**

RG (3)  
 $\alpha$ -value 0.95

### **e2: NATURAL ENVIRONMENT**

#### **e225: climate**

LYHTY (2)  
 $\alpha$ -value 0.723

#### **e298 other specified natural environment**

#### **Covid-19 pandemic**

#### **e298 (impact on):**

- fatigue
- sleep
- emotions
- pain
- general health
- physical functioning
- daily living
- social life
- applying to health and social services due to the fear of infection
- access to health and social services

\*d450 Walking and d465 moving around using equipment and e1201 assistive products and technology for personal indoor and outdoor mobility were addressed in same questions.

### **d8: MAJOR LIFE AREAS**

#### **d850 remunerative and d855 non-remunerative employment**

PROMIS® - Satisfaction with PSR (1)

### **d9: COMMUNITY SOCIAL AND CIVIC LIFE**

#### **d920 Recreation and leisure**

PROMIS® - Satisfaction with Participation in DSA (1)
